# Supplementary material
Source: PubMed Central journal article supplement (PMC10698619)
Supplement: jama-e2322114-s003.pdf [file jama-e2322114-s003.pdf]

| <b>*Group Name(s): The Pediatric Adenotonsillectomy Trial for Snoring (PATS) Study Team</b> |                   |                              |                  |                                                    |                                          |                                                         |                                                                                            |
|---------------------------------------------------------------------------------------------|-------------------|------------------------------|------------------|----------------------------------------------------|------------------------------------------|---------------------------------------------------------|--------------------------------------------------------------------------------------------|
| <b>*First Name and Middle Initial(s)</b>                                                    | <b>*Last Name</b> | <b>*Suffix (eg, Jr, III)</b> | Academic Degrees | Institution                                        | Location (city, state/province, country) | Role or Contribution, eg, chair, principal investigator | Group (if more than 1 Group listed in the byline) and/or Subgroup (eg, Steering Committee) |
| Michael N                                                                                   | Rueschman         |                              | MPA              | Brigham and Women's Hospital                       | Boston, MA                               | Data Manager                                            |                                                                                            |
| Meg                                                                                         | Tully             |                              | MS               | Brigham and Women's Hospital                       | Boston, MA                               | Biotatistician                                          |                                                                                            |
| Jean                                                                                        | Arnold            |                              | BS               | Brigham and Women's Hospital                       | Boston, MA                               | Research Staff                                          |                                                                                            |
| Michelle                                                                                    | Nicholson         |                              | AB               | Brigham and Women's Hospital                       | Boston, MA                               | Research Staff                                          |                                                                                            |
| Emily                                                                                       | Kaplan            |                              | BS               | Brigham and Women's Hospital                       | Boston, MA                               | Research Staff                                          |                                                                                            |
| Dan                                                                                         | Mobley            |                              | RPSG, CCSH       | Brigham and Women's Hospital                       | Boston, MA                               | Research Staff                                          |                                                                                            |
| Michael                                                                                     | Morrical          |                              | BFA              | Brigham and Women's Hospital                       | Boston, MA                               | Research Staff                                          |                                                                                            |
| Laurie                                                                                      | Karamessinis      |                              |                  | Children's Hospital of Philadelphia                | Philadelphia, PA                         | Research Staff                                          |                                                                                            |
| Michelle                                                                                    | Ward              |                              |                  | Children's Hospital of Philadelphia                | Philadelphia, PA                         | Research Staff                                          |                                                                                            |
| Mary Ann                                                                                    | Cornaglia         |                              |                  | Children's Hospital of Philadelphia                | Philadelphia, PA                         | Research Staff                                          |                                                                                            |
| Ruth                                                                                        | Bradford          |                              |                  | Children's Hospital of Philadelphia                | Philadelphia, PA                         | Research Staff                                          |                                                                                            |
| Alyssa                                                                                      | Ciampaglia        |                              |                  | Children's Hospital of Philadelphia                | Philadelphia, PA                         | Research Staff                                          |                                                                                            |
| Hayley                                                                                      | Groubert          |                              |                  | Rainbow Babies and Children's Hospital of Clevelan | Cleveland, OH                            | Research Staff                                          |                                                                                            |
| Erica                                                                                       | Denallo           |                              |                  | Rainbow Babies and Children's Hospital of Clevelan | Cleveland, OH                            | Research Staff                                          |                                                                                            |
| Rasal                                                                                       | Rajashari         |                              |                  | Rainbow Babies and Children's Hospital of Clevelan | Cleveland, OH                            | Research Staff                                          |                                                                                            |
| Morgan                                                                                      | Pyzoha            |                              |                  | Rainbow Babies and Children's Hospital of Clevelan | Cleveland, OH                            | Research Staff                                          |                                                                                            |
| Heather                                                                                     | Rogers            |                              |                  | Rainbow Babies and Children's Hospital of Clevelan | Cleveland, OH                            | Research Staff                                          |                                                                                            |
| Kieran                                                                                      | McKibben          |                              |                  | Rainbow Babies and Children's Hospital of Clevelan | Cleveland, OH                            | Research Staff                                          |                                                                                            |
| Suzie                                                                                       | Hicks             |                              |                  | Cincinnati Children's Hospital Medical Center      | Cincinnati, OH                           | Research Staff                                          |                                                                                            |
| Belinda                                                                                     | Carter            |                              |                  | Cincinnati Children's Hospital Medical Center      | Cincinnati, OH                           | Research Staff                                          |                                                                                            |
| Melodie                                                                                     | Boh               |                              |                  | Cincinnati Children's Hospital Medical Center      | Cincinnati, OH                           | Research Staff                                          |                                                                                            |
| Krista                                                                                      | Swegheimer        |                              |                  | Cincinnati Children's Hospital Medical Center      | Cincinnati, OH                           | Research Staff                                          |                                                                                            |
| Stacey                                                                                      | Niehaus           |                              |                  | Cincinnati Children's Hospital Medical Center      | Cincinnati, OH                           | Research Staff                                          |                                                                                            |
| Emily                                                                                       | Herresoff         |                              |                  | University of Michigan Health System               | Ann Arbor, MI                            | Research Staff                                          |                                                                                            |
| Marianne                                                                                    | Heffner           |                              |                  | University of Michigan Health System               | Ann Arbor, MI                            | Research Staff                                          |                                                                                            |
| Judy                                                                                        | Fetterolf         |                              |                  | University of Michigan Health System               | Ann Arbor, MI                            | Research Staff                                          |                                                                                            |

## Supplemental Online Content: Nonauthor Collaborators

\*First name, last name, and suffix (if applicable) are required and will appear in PubMed.

| *First Name and Middle Initial(s) | *Last Name | *Suffix (eg, Jr, III) | Academic Degrees | Institution                                     | Location (city, state/province, country) | Role or Contribution, eg, chair, principal investigator | Group (if more than 1 Group listed in the byline) and/or Subgroup (eg, Steering Committee) |
|-----------------------------------|------------|-----------------------|------------------|-------------------------------------------------|------------------------------------------|---------------------------------------------------------|--------------------------------------------------------------------------------------------|
| Bill                              | Geal       |                       |                  | University of Michigan Health System            | Ann Arbor, MI                            | Research Staff                                          |                                                                                            |
| Sarah                             | Brand      |                       |                  |                                                 | Ann Arbor, MI                            | Research Staff                                          |                                                                                            |
| Braden                            | DeWeese    |                       |                  | University of Michigan Health System            | Ann Arbor, MI                            | Research Staff                                          |                                                                                            |
| Libby                             | Johnson    |                       |                  | University of Michigan Health System            | Ann Arbor, MI                            | Research Staff                                          |                                                                                            |
| Kristin                           | Brierly    |                       |                  | University of Michigan Health System            | Ann Arbor, MI                            | Research Staff                                          |                                                                                            |
| Allison                           | Jordan     |                       |                  | University of Michigan Health System            | Ann Arbor, MI                            | Research Staff                                          |                                                                                            |
| Kacee                             | Pavelka    |                       |                  | University of Michigan Health System            | Ann Arbor, MI                            | Research Staff                                          |                                                                                            |
| Jay                               | Sands      |                       |                  | University of Michigan Health System            | Ann Arbor, MI                            | Research Staff                                          |                                                                                            |
| Ashley                            | Szpara     |                       |                  | University of Michigan Health System            | Ann Arbor, MI                            | Research Staff                                          |                                                                                            |
| Francesca                         | Chambers   |                       |                  | University of Texas Southwestern Medical Center | Dallas, TX                               | Research Staff                                          |                                                                                            |
| Laura                             | Vargas     |                       |                  | University of Texas Southwestern Medical Center | Dallas, TX                               | Research Staff                                          |                                                                                            |
| Constance                         | Eshon      |                       |                  | University of Texas Southwestern Medical Center | Dallas, TX                               | Research Staff                                          |                                                                                            |
| Florence                          | George     |                       |                  | University of Texas Southwestern Medical Center | Dallas, TX                               | Research Staff                                          |                                                                                            |
| Mary                              | Martin     |                       |                  | University of Texas Southwestern Medical Center | Dallas, TX                               | Research Staff                                          |                                                                                            |
| Vernell                           | Sparks     |                       |                  | University of Texas Southwestern Medical Center | Dallas, TX                               | Research Staff                                          |                                                                                            |
| Victoria                          | Young      |                       |                  | University of Texas Southwestern Medical Center | Dallas, TX                               | Research Staff                                          |                                                                                            |
| Laura                             | Stone      |                       |                  | Children's Hospital of the King's Daughters     | Norfolk, VA                              | Research Staff                                          |                                                                                            |
| Amy                               | Boykin     |                       |                  | Children's Hospital of the King's Daughters     | Norfolk, VA                              | Research Staff                                          |                                                                                            |
| Emily                             | Riggan     |                       |                  | Children's Hospital of the King's Daughters     | Norfolk, VA                              | Research Staff                                          |                                                                                            |
| Thomas                            | Boswick    |                       |                  | Children's Hospital of the King's Daughters     | Norfolk, VA                              | Research Staff                                          |                                                                                            |

Supplemental Online Content: Nonauthor Collaborators

\*First name, last name, and suffix (if applicable) are required and will appear in PubMed.

| *First Name and Middle Initial(s) | *Last Name | *Suffix (eg, Jr, III) | Academic Degrees | Institution                                 | Location (city, state/province, country) | Role or Contribution, eg, chair, principal investigator | Group (if more than 1 Group listed in the byline) and/or Subgroup (eg, Steering Committee) |
|-----------------------------------|------------|-----------------------|------------------|---------------------------------------------|------------------------------------------|---------------------------------------------------------|--------------------------------------------------------------------------------------------|
| Michael                           | Bailey     |                       |                  | Children's Hospital of the King's Daughters | Norfolk, VA                              | Research Staff                                          |                                                                                            |
| Amanda                            | Stetler    |                       |                  | Children's Hospital of the King's Daughters | Norfolk, VA                              | Research Staff                                          |                                                                                            |
| Addy                              | Tham       |                       |                  | Children's Hospital of the King's Daughters | Norfolk, VA                              | Research Staff                                          |                                                                                            |
