# Supplementary material
Source: PubMed Central journal article supplement (PMC10698619)
Supplement: jama-e2322114-s004.pdf [file jama-e2322114-s004.pdf]

## Data Sharing Statement

Redline. Adenotonsillectomy For Snoring and Mild Sleep Apnea In Children. *JAMA*. Published December 05, 2023. doi:10.1001/jama.2023.22114

### Data

**Data available:** Yes

**Data types:** Deidentified participant data, Data dictionary

**How to access data:** [www.sleepdata.org](http://www.sleepdata.org)

**When available:** With publication

### Supporting Documents

**Document types:** Informed consent form

**How to access documents:** [sleepdata.org](http://sleepdata.org)

**When available:** With publication

### Additional Information

**Who can access the data:** Researchers whose proposed use of data is approved (a generally "open" process, established by the National Sleep Research Resource)

**Types of analyses:** research fits under broad goals of understanding sleep health and treatments to improve sleep and health in children

**Mechanisms of data availability:** with on-line approval of a Data Use Agreement
